# Supplementary material
Source: Springer Nature journal article supplement (https://www.springermedizin.de/resource/supplementary/12936_2006_211_MOESM1_ESM.pdf/9547186)

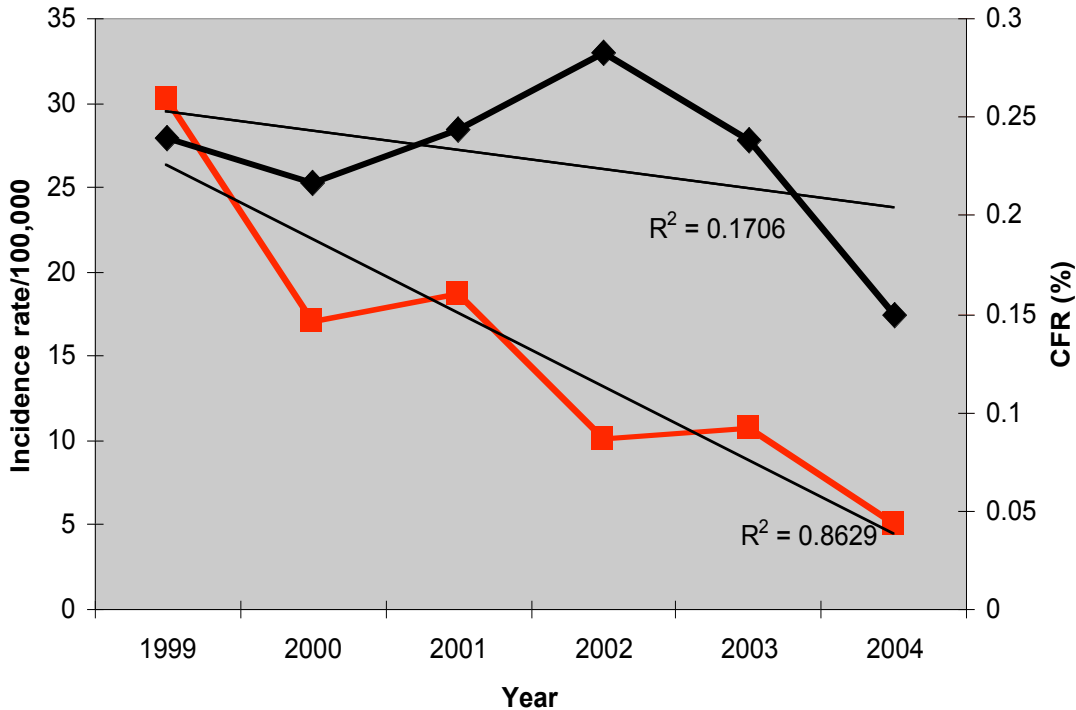

—■— Incidence rate

—◆— CFR

— Linear (Incidence rate)

Supplement: MOESM1 [file 9547186]
